# Supplementary material for: Polygenic risk score for ulcerative colitis predicts immune checkpoint inhibitor-mediated colitis
Source: bioRxiv or medRxiv preprint supplement (doi:10.1101/2023.05.15.23289680), 2023-09-13
Supplement: Supplementary file [file media-2.pdf]

**Supplementary Table 1: Characteristics of the BioVU replication cohort overall and by immune checkpoint inhibitor-mediated colitis (IMC)**

| <b>Characteristics</b>                      | <b>Overall</b> | <b>All-grade IMC</b> | <b>Severe IMC</b> |
|---------------------------------------------|----------------|----------------------|-------------------|
|                                             | (n=1147)       | (n=104)              | (n=83)            |
| <b>Mean age at diagnosis (SD)</b>           | 62.1 (13.1)    | 61.6 (12.7)          | 61.4 (12.9)       |
| <b>Sex, n (%)</b>                           |                |                      |                   |
| <i>Male</i>                                 | 727 (63.4)     | 62 (59.6)            | 48 (57.8)         |
| <i>Female</i>                               | 420 (36.6)     | 42 (40.4)            | 35 (42.2)         |
| <b>Type of therapy, n (%)</b>               |                |                      |                   |
| <i>Anti PD-1/PD-L1 monotherapy</i>          | 828 (72.7)     | 34 (32.7)            | 23 (27.7)         |
| <i>Anti PD-1/PD-L1 + Anti CTLA4 therapy</i> | 45 (3.9)       | 25 (24.0)            | 22 (26.5)         |
| <i>Anti CTLA4 monotherapy</i>               | 274 (23.9)     | 45 (43.3)            | 38 (45.8)         |

IMC: Immune checkpoint inhibitor-mediated colitis, SD: Standard deviation

**Supplementary Table 2: Previously published polygenic risk score (PRS) of ulcerative colitis as a predictor of time to development of all-grade immune checkpoint inhibitor-mediated colitis (IMC) in the entire GeRI cohort, using Cox proportional hazards models**

| <i>All-grade IMC</i>   |                      |                  |                    |             |             |
|------------------------|----------------------|------------------|--------------------|-------------|-------------|
| <i>PRS<sup>a</sup></i> | <i>PRS method</i>    | <i>HR per SD</i> | <i>95% CI</i>      | <i>P</i>    | <i>Ref.</i> |
| 179-SNP PRS            | SNPnet               | 1.24             | 0.94 - 1.64        | 0.13        | 1           |
| 809-SNP PRS            | SNPnet               | <b>1.33</b>      | <b>1.01 – 1.74</b> | <b>0.04</b> | 1           |
| 1,505-SNP PRS          | Penalized Regression | <b>1.37</b>      | <b>1.02 – 1.85</b> | <b>0.04</b> | 2           |
| 566,637-SNP PRS        | LDPred2              | <b>1.41</b>      | <b>1.04 – 1.91</b> | <b>0.03</b> | 2           |

<sup>a</sup>Models are adjusted for age at diagnosis, sex, histology, type of therapy, recruiting site, and 5 principal components. IMC: Immune checkpoint inhibitor-mediated colitis, PRS: Polygenic risk score, HR: Hazard ratio, SD: Standard deviation, CI: Confidence interval, SNP: Single nucleotide polymorphism

1. Tanigawa Y, Qian J, Venkataraman G, et al. Significant sparse polygenic risk scores across 813 traits in UK Biobank. *PLoS Genetics*. 2022;18(3):e1010105. doi:10.1371/journal.pgen.1010105
2. Privé F, Aschard H, Carmi S, et al. Portability of 245 polygenic scores when derived from the UK Biobank and applied to 9 ancestry groups from the same cohort. *The American Journal of Human Genetics*. 2022;109(1):12-23. doi:10.1016/j.ajhg.2021.11.008
